# Supplementary material for: Cu2+-activatable fluorescence and chemiluminescence dual-mode sensing platform for visual detection of thiram
Source: Royal Society of Chemistry journal article supplement (doi:10.1039/d5cc03008k), 2025-01-01
Supplement: d5cc03008k1.pdf [file d5cc03008k1.pdf]

## Supporting Information

### **Cu<sup>2+</sup>-Activatable Fluorescence and Chemiluminescence Dual-Mode Sensing Platform for Visual Detection of Thiram**

Pan Zhu<sup>a</sup>, Yuanyu Tang<sup>a</sup>, Yu Tang<sup>b</sup>, Yating Xu<sup>a</sup>, Shaojing Zhao<sup>a</sup>, Chaoyi Yao<sup>a</sup>, Benhua Wang<sup>a</sup>, Xiangzhi Song<sup>a</sup>, Minhuan Lan<sup>a, \*</sup>

<sup>a</sup>College of Chemistry and Chemical Engineering, Central South University, Changsha, 410083, P. R. China

<sup>b</sup>Department of Gastroenterology, The Third Xiangya Hospital of Central South University, Changsha, 410013, P. R. China

#### **1. Experimental General**

**Instruments and materials.** Unless otherwise stated, all solvents and chemicals were purchased from commercial suppliers in analytical grade and used without further purification. Ultrapure water was used in all spectroscopic studies. The <sup>1</sup>H and <sup>13</sup>C NMR spectra were recorded on a Bruker AVANCE III 400 or 500 spectrometer, using TMS as an internal standard. High resolution mass spectrometry data was obtained from the Bruker compact instrument. Absorption spectra were collected on a Shimadzu UV-2600 spectrophotometer, fluorescence and chemiluminescence spectra were performed on a Hitachi F-7000 fluorescence spectrophotometer. Chemiluminescence images were collected by virtue of Aniview 100 IVIS system.

**Theoretical calculation.** The optimized molecular geometry of **Ac-Do-Py** were performed via the Gaussian 16, Revision C.01<sup>1</sup>, at a B3LYP/6-311G(d) level. The electrostatic potential (ESP) was calculated based on the optimized molecular geometry and analyzed with Multiwfn<sup>2,3</sup>. The Visual Molecular Dynamics program was used to plot the color-filled iso-surface graphs to visualize the maps of ESP surfaces<sup>4</sup>.

**Spectrum test.** The UV-Vis absorption, fluorescence ( $\lambda_{\text{ex}} = 400 \text{ nm}$ ), and chemiluminescence spectra of **Ac-Do-Py** were recorded using UV-2600 and F-7000 spectrometers, respectively.

**Fluorescence kinetics.** 5  $\mu\text{M}$  **Ac-Do-Py** in HEPES ( $\text{pH} = 7.4$ ) with  $\text{Cu}^{2+}$  (30  $\mu\text{M}$ ) was placed in the F-7000 spectrometer. Fluorescence spectra were acquired at an interval of 5 min.

**Chemiluminescence kinetics.** 5  $\mu\text{M}$  **Ac-Do-Py** in HEPES ( $\text{pH} = 7.4$ ) with  $\text{Cu}^{2+}$  (30  $\mu\text{M}$ ) was placed in the AniView 100 imaging device. Chemiluminescence signals were recorded for 40 min. Unless otherwise stated, chemiluminescence imaging parameters were as follows: bioluminescence mode, open channel, automatic exposure, and field of view: D. Regions of interest (ROI) for image analysis were defined using AniView software.

**Detection of thiram in solution.** First,  $\text{Cu}^{2+}$  (30  $\mu\text{M}$ ) was added to HEPES solutions ( $\text{pH} = 7.4$ ) containing thiram at different concentrations (0, 10, 20, 40, and 60  $\mu\text{M}$ ). The mixture was incubated for 60 min. Then, **Ac-Do-Py** (5  $\mu\text{M}$ ) was added to the thiram/ $\text{Cu}^{2+}$  solution. Fluorescence spectra ( $\lambda_{\text{ex}} = 420 \text{ nm}$ ) were recorded 3 min after the addition of the probe. Chemiluminescence images were captured after 10 min using the AniView 100 device.

***In situ* detection of thiram on actual fruits.** Thiram (60  $\mu\text{M}$ ) was sprayed onto the surfaces of orange peel, strawberry leaves, and cherry leaves. Then,  $\text{Cu}^{2+}$  (30  $\mu\text{M}$ ) was sprayed onto the fruit samples and incubated for 30 min followed by **Ac-Do-Py** (5  $\mu\text{M}$ ). Immediately after completing these steps, the samples were subjected to chemiluminescence imaging using the IVIS system.

## 2. Synthetic Methods.

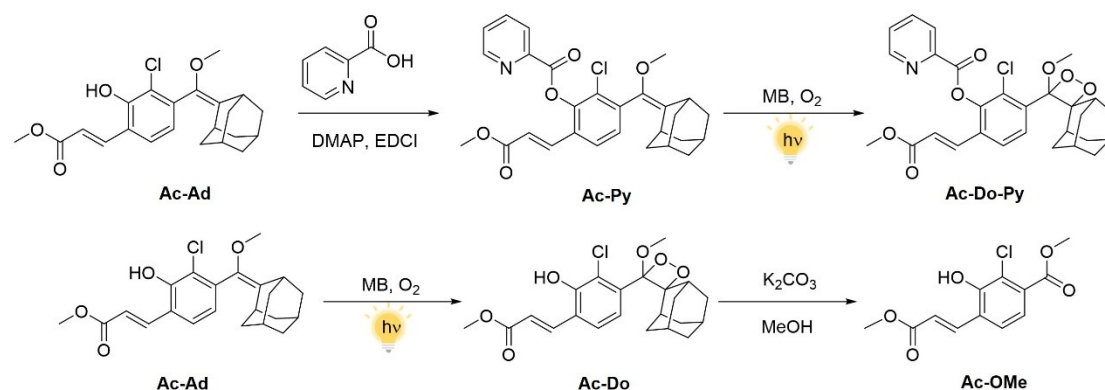

**Scheme S1** Synthesis routes of **Ac-Do-Py** and **Ac-OMe**.

### Synthesis of **Ac-Py**

**Ac-Ad** was synthesized according to the literature<sup>5</sup>.

**Ac-Ad** (50 mg, 0.13 mmol), 2-pyridinecarboxylic acid (24 mg, 0.195 mmol), 4-Dimethylaminopyridine (4.8 mg, 0.04 mmol), and 1-(3-Dimethylaminopropyl)-3-ethylcarbodiimide hydrochloride (37 mg, 0.195 mmol) were dissolved in 8 mL of dry dichloromethane (DCM). The above mixture was stirred at room temperature for 5 h under nitrogen atmosphere, and then diluted with DCM and washed with brine. The organic phase was dried over anhydrous  $\text{Na}_2\text{SO}_4$ , and then the crude product was purified by silica gel column chromatography with petroleum ether/ethyl acetate (PE/EA) = 10/3 as the eluent to obtain an off-white solid (45 mg, 74% yield).  $^1\text{H}$  NMR (400 MHz,  $\text{CDCl}_3$ , ppm)  $\delta$  = 8.91 (d,  $J$  = 3.9 Hz, 1H), 8.34 (dt,  $J$  = 7.8, 1.1 Hz, 1H), 7.98 (td,  $J$  = 7.8, 1.7 Hz, 1H), 7.76 (d,  $J$  = 16.0 Hz, 1H), 7.63 (ddd,  $J$  = 7.7, 4.7, 1.2 Hz, 1H), 7.58 (d,  $J$  = 8.1 Hz, 1H), 7.27 (s, 1H), 7.25 (s, 1H), 6.53 (d,  $J$  = 16.0 Hz, 1H), 3.74 (s, 3H), 3.34 (s, 3H), 3.28 (s, 1H), 2.13 (s, 1H), 1.88 (dt,  $J$  = 40.9, 24.8 Hz, 12H).  $^{13}\text{C}$  NMR (101 MHz,  $\text{CDCl}_3$ , ppm)  $\delta$  = 166.68, 162.44, 146.39, 146.33, 138.94, 137.98, 137.40, 137.34, 132.96, 129.69, 129.06, 128.99, 127.86, 126.28, 125.15, 121.41, 57.26, 51.79, 39.26, 39.04, 38.59, 37.04, 32.91, 29.77, 28.28. HRMS (ESI)  $m/z$ :  $[\text{M} + \text{H}]^+$  calcd for  $\text{C}_{28}\text{H}_{28}\text{ClNO}_5$ , 494.1729; found, 494.1981

### Synthesis of **Ac-Do-Py**

**Ac-Py** (15 mg, 0.03 mmol) and methylene blue (1 mg, 0.003 mmol) were dissolved in

10 mL of dry DCM. The mixture was allowed to cool to 0 °C and oxygen was bubbled into the solution under yellow light (50 W/cm<sup>2</sup>) irradiation for 60 min. The **Ac-Do-Py** was obtained by silica gel column chromatography with PE/EA = 3/1 as the eluent (11 mg, 68% yield). <sup>1</sup>H NMR (500 MHz, CDCl<sub>3</sub>, ppm) δ = 8.91 (ddd, *J* = 4.7, 1.7, 0.8 Hz, 1H), 8.33 (dt, *J* = 7.8, 1.1 Hz, 1H), 8.10 (d, *J* = 8.4 Hz, 1H), 7.98 (td, *J* = 7.7, 1.8 Hz, 1H), 7.79 - 7.70 (m, 2H), 7.64 (ddd, *J* = 7.7, 4.8, 1.2 Hz, 1H), 6.59 (d, *J* = 16.0 Hz, 1H), 3.75 (s, 3H), 3.24 (s, 3H), 3.01 (d, *J* = 4.5 Hz, 1H), 2.23 (d, *J* = 12.8 Hz, 1H), 2.05 (d, *J* = 4.2 Hz, 1H), 1.97 - 1.37 (m, 11H). <sup>13</sup>C NMR (126 MHz, CDCl<sub>3</sub>, ppm) δ = 166.48, 150.35, 147.08, 146.00, 137.53, 136.86, 135.12, 130.90, 130.84, 128.06, 126.85, 126.39, 125.33, 122.65, 111.61, 96.43, 51.91, 49.80, 36.56, 33.90, 33.60, 32.21, 31.58, 31.51, 26.17, 25.73. HRMS (ESI) *m/z*: [M + H]<sup>+</sup> calcd for C<sub>28</sub>H<sub>28</sub>ClNO<sub>7</sub>, 526.1628; found, 526.1899.

#### Synthesis of **Ac-OMe**

**Ac-Ad** (20 mg, 0.05 mmol) and methylene blue (2 mg, 0.006 mmol) were dissolved in 10 mL of dry DCM. The mixture solution was cooled to 0 °C and then oxygen was bubbled under yellow light (50 W/cm<sup>2</sup>) irradiation. After the reaction is completed, **Ac-Do** (15 mg, 0.03 mmol) was directly obtained by silica gel column chromatography with PE/EA = 4/1 as the eluent. After that, **Ac-Do** was dissolved in 2 mL of methanol followed by addition of 10 mg of K<sub>2</sub>CO<sub>3</sub>. After completion, the solvent was removed under reduced pressure. the crude product was purified by silica gel column chromatography with PE/EA = 4/1 as the eluent to afford **Ac-OMe** as a white solid (6 mg, 62% yield). <sup>1</sup>H NMR (400 MHz, CDCl<sub>3</sub>, ppm) δ = 7.93 (d, *J* = 16.2 Hz, 1H), 7.50 - 7.42 (m, 2H), 6.66 (d, *J* = 16.2 Hz, 1H), 3.94 (s, 3H), 3.82 (s, 3H).

### 3. Supplementary Figures

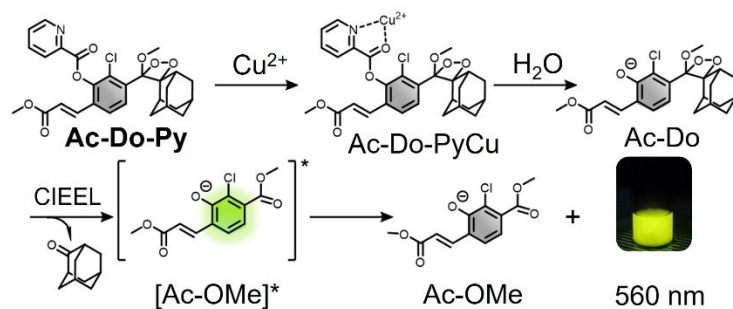

**Fig. S1** Schematic illustration of the response mechanism of **Ac-Do-Py** towards  $\text{Cu}^{2+}$  and a photograph showing the generation of chemiluminescence under strong basic conditions.

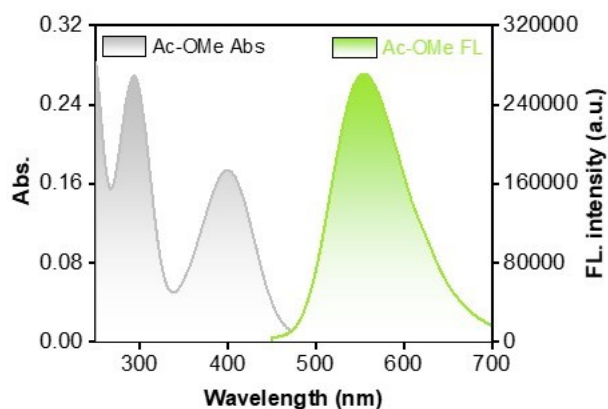

**Fig. S2** Absorption and fluorescence spectra of **Ac-OMe** in HEPES (pH = 7.4, containing 10% DMSO).

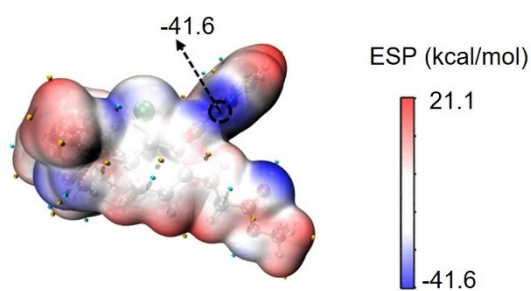

**Fig. S3** ESP distribution of **Ac-Do-Py**.

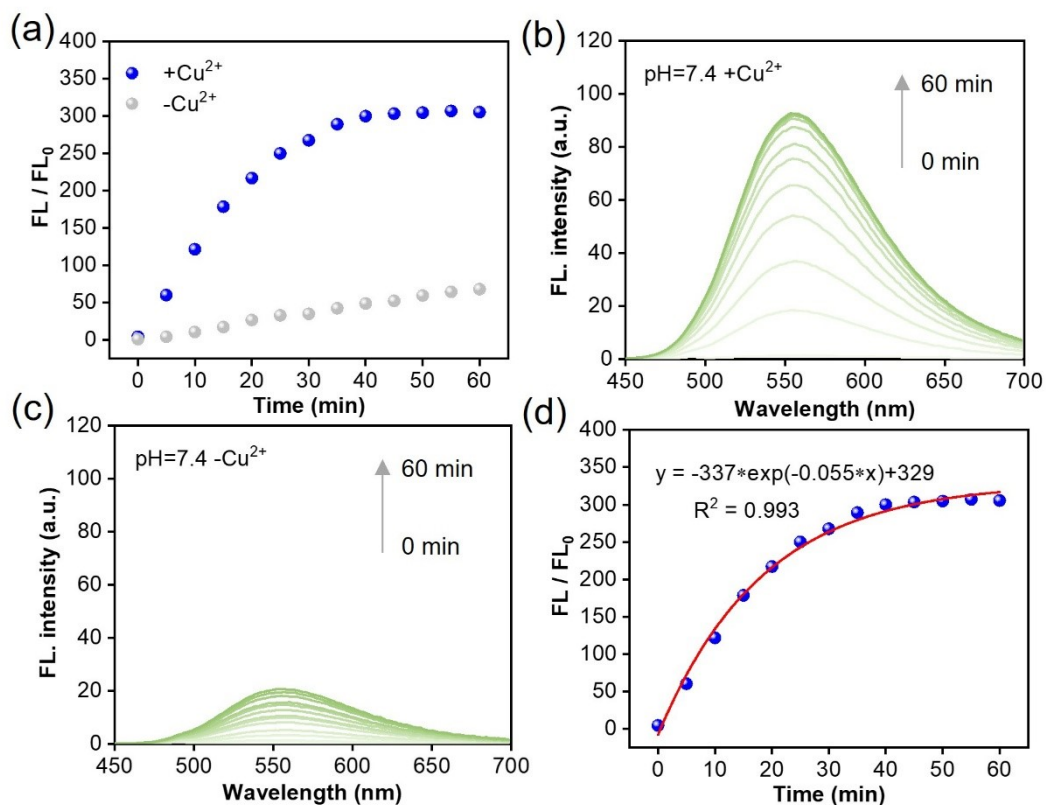

**Fig. S4** (a) Fluorescence kinetics of **Ac-Do-Py** (5  $\mu\text{M}$ ) in HEPES buffer in the presence or absence of  $\text{Cu}^{2+}$ . Time-dependent fluorescence spectra of **Ac-Do-Py** (5  $\mu\text{M}$ ) in the presence (b) and absence (c) of  $\text{Cu}^{2+}$  (30  $\mu\text{M}$ ). (d) The fitting curve of the fluorescence kinetic data, which is in accord with a first-order equation with a rate constant ( $k$ ) of  $0.05 \text{ min}^{-1}$  for the reaction between **Ac-Do-Py** (5  $\mu\text{M}$ ) and  $\text{Cu}^{2+}$  (30  $\mu\text{M}$ ).

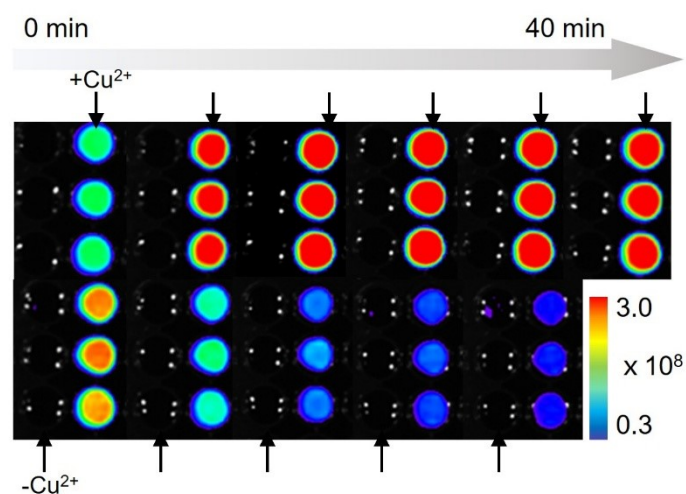

**Fig. S5** Time-dependent chemiluminescence images of **Ac-Do-Py** (5  $\mu\text{M}$ ) in the presence of and absence of  $\text{Cu}^{2+}$  (30  $\mu\text{M}$ )

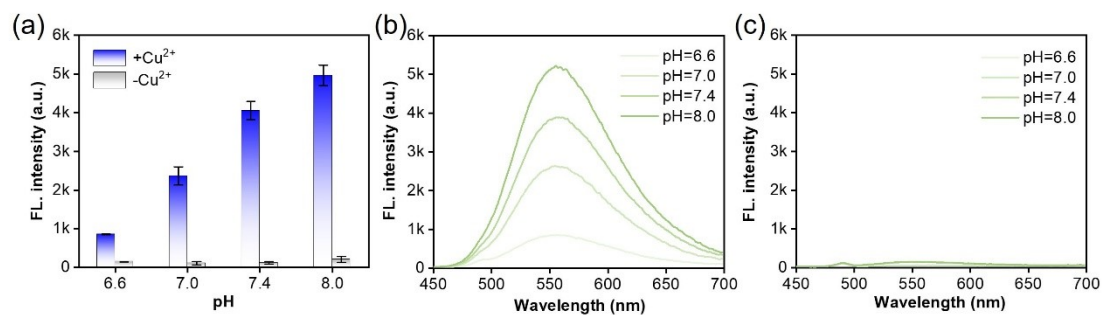

**Fig. S6** (a) Fluorescence of **Ac-Do-Py** (5  $\mu$ M) in the presence or absence of  $\text{Cu}^{2+}$  (30  $\mu$ M) in HEPES buffers at different pH values. Fluorescence spectra of **Ac-Do-Py** (5  $\mu$ M) in HEPES with different pH values in the presence (b) and absence (c) of  $\text{Cu}^{2+}$  (30  $\mu$ M). Fluorescence spectra were collected after incubation with  $\text{Cu}^{2+}$  for 3 min.

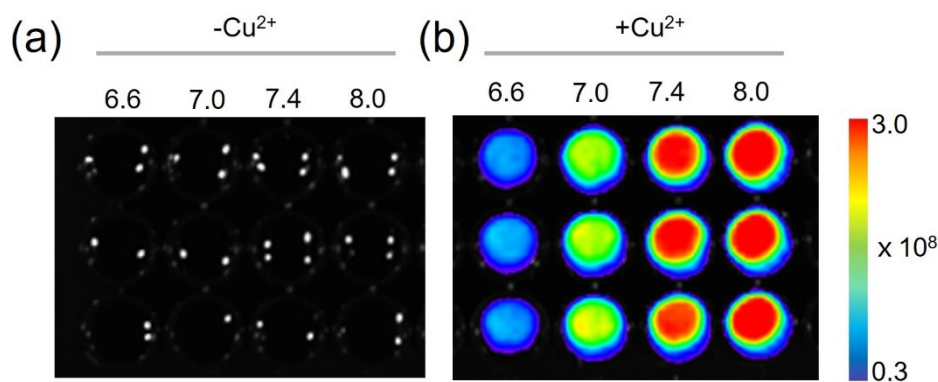

**Fig. S7** Chemiluminescence images of **Ac-Do-Py** (5  $\mu$ M) in HEPES with different pH values in the absence (a) and presence (b) of  $\text{Cu}^{2+}$  (30  $\mu$ M). Chemiluminescence images were acquired after 10 min in the absence or the presence of  $\text{Cu}^{2+}$ .

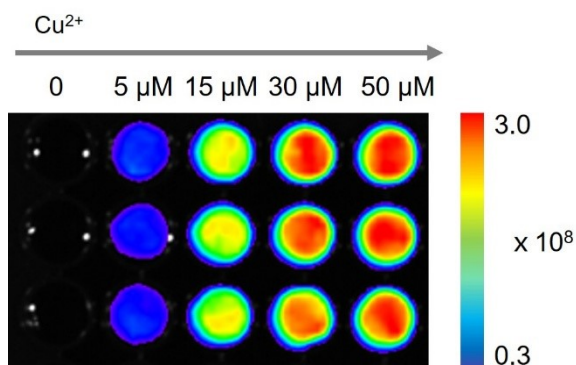

**Fig. S8** Chemiluminescence images of **Ac-Do-Py** (5  $\mu$ M) treated with different concentration of  $\text{Cu}^{2+}$ .

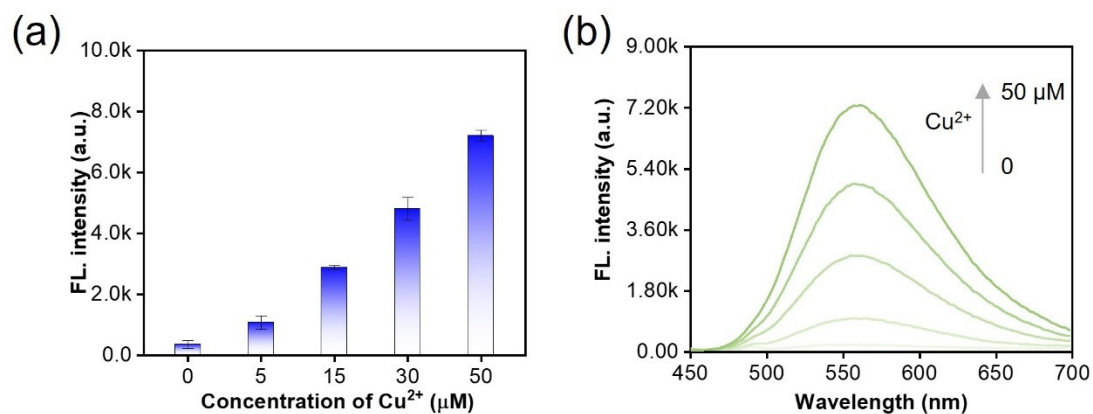

**Fig. S9** (a) Fluorescence intensity and (b) spectra of **Ac-Do-Py** (5 μM) treated with different concentration of Cu<sup>2+</sup>.

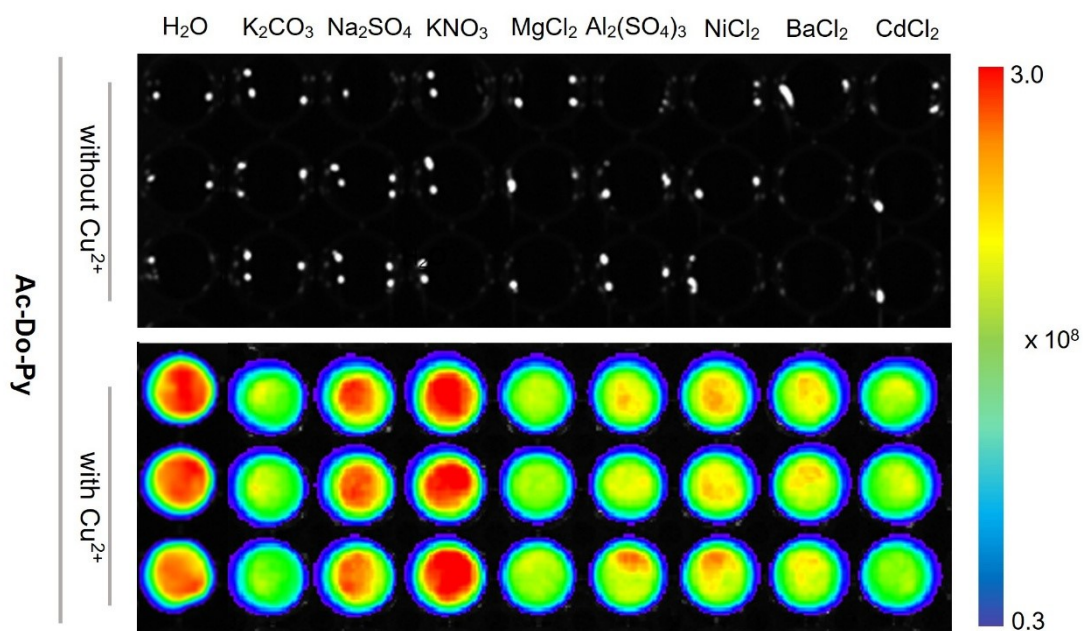

**Fig. S10** Chemiluminescence images of **Ac-Do-Py** (5 μM) treated with various interferents in the absence or presence of Cu<sup>2+</sup> for 10 min (Cu<sup>2+</sup>: 30 μM, interferents: 100 μM).



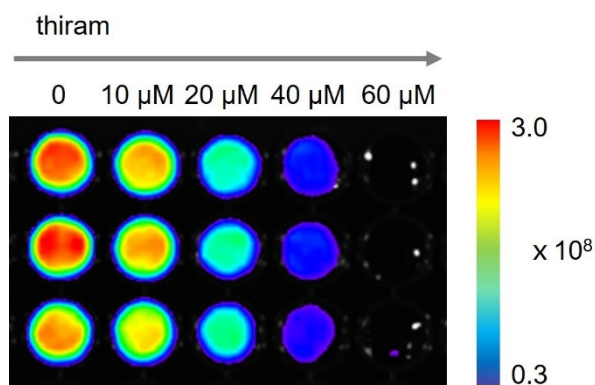

**Fig. S11** Chemiluminescence images of **Ac-Do-Py** (5  $\mu\text{M}$ )/ $\text{Cu}^{2+}$  (30  $\mu\text{M}$ ) and different concentration of thiram. (Chemiluminescence signal was acquired 10 min after addition of  $\text{Cu}^{2+}$ ).

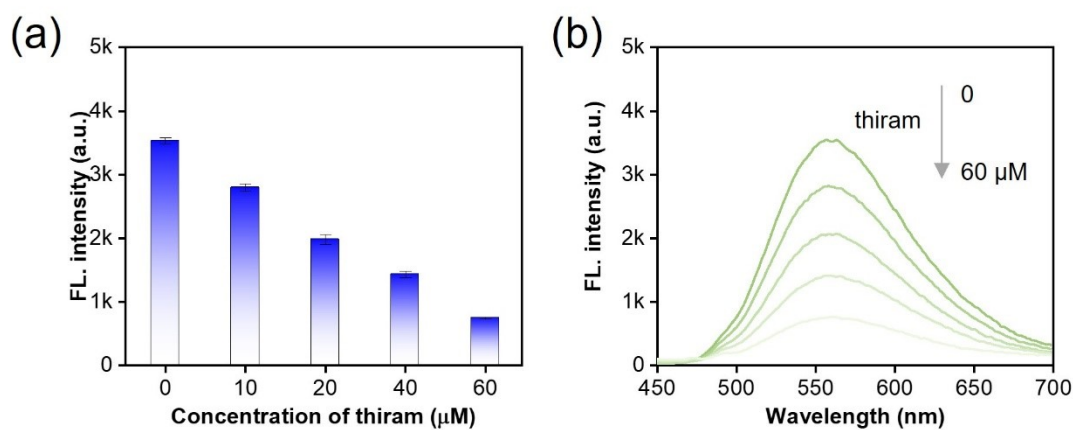

**Fig. S12** (a) Fluorescence intensity and (b) spectra of **Ac-Do-Py** (5  $\mu\text{M}$ )/ $\text{Cu}^{2+}$  (30  $\mu\text{M}$ ) and different concentration of thiram. (Fluorescence was collected 3 min after incubation with  $\text{Cu}^{2+}$ ).

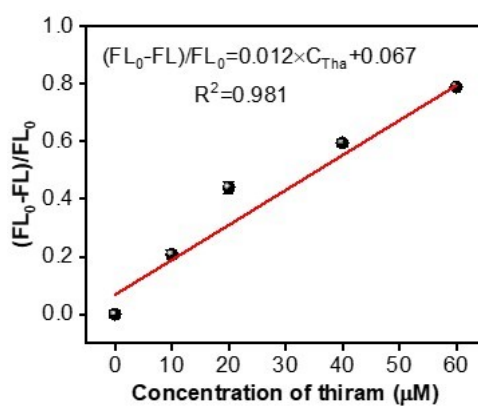

**Fig. S13** Linear relationship between fluorescence quenching efficiency,  $(\text{FL}_0 - \text{FL})/\text{FL}_0$ , and thiram

concentration. FL and FL<sub>0</sub> represent the fluorescence intensity in the presence and absence of thiram, respectively.

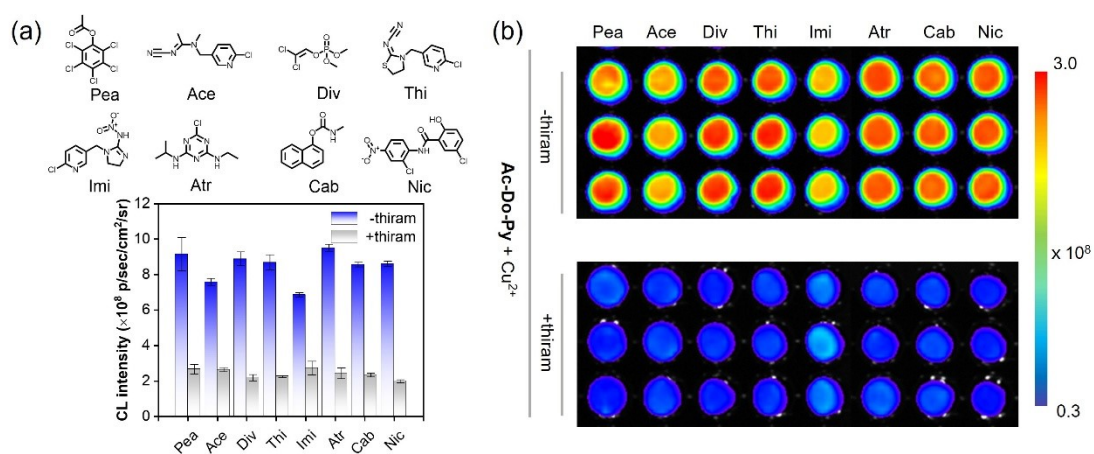

**Fig. S14** (a) Structures of eight pesticides and the corresponding quantification of chemiluminescence intensity. (b) Chemiluminescence images of **Ac-Do-Py** (5  $\mu\text{M}$ ) incubated with  $\text{Cu}^{2+}$  (30  $\mu\text{M}$ ) and different pesticides (40  $\mu\text{M}$ ) for 10 min, in the absence (top) and the presence (bottom) of thiram (40  $\mu\text{M}$ ). Abbreviations: Pea = pentachlorophenol acetate, Ace = acetamiprid, Div = dichlorvos, Thi = thiacloprid, Imi = imidacloprid, Atr = atrazine, Acm = carbaryl, and Nic = nicosamide.

**Table S1.** Comparison of the methods for detection of thiram

| Materials                              | Methods                        | LOD ( $\mu\text{M}$ ) | Ref.      |
|----------------------------------------|--------------------------------|-----------------------|-----------|
| CDs-Ag <sup>+</sup> -based SA hydrogel | Fluorescence                   | 0.017                 | (6)       |
| Ag-AuNDs                               | SERS                           | 0.358                 | (7)       |
| Ag@CDS                                 | SERS                           | 0.1                   | (8)       |
| B-QDs/G-QDs/R-QDs                      | Fluorescence/Colorimetry       | 0.073/0.142           | (9)       |
| N-CQDs/CuNCs                           | Ratiometric fluorescence       | 0.0075                | (10)      |
| GSH-Fe nanozyme                        | Colorimetry                    | 0.125                 | (11)      |
| Schaap's dioxetane-based organic probe | Fluorescence/Chemiluminescence | 3.5/0.1               | This work |

#### 4. $^1\text{H}$ NMR and $^{13}\text{C}$ NMR Spectra

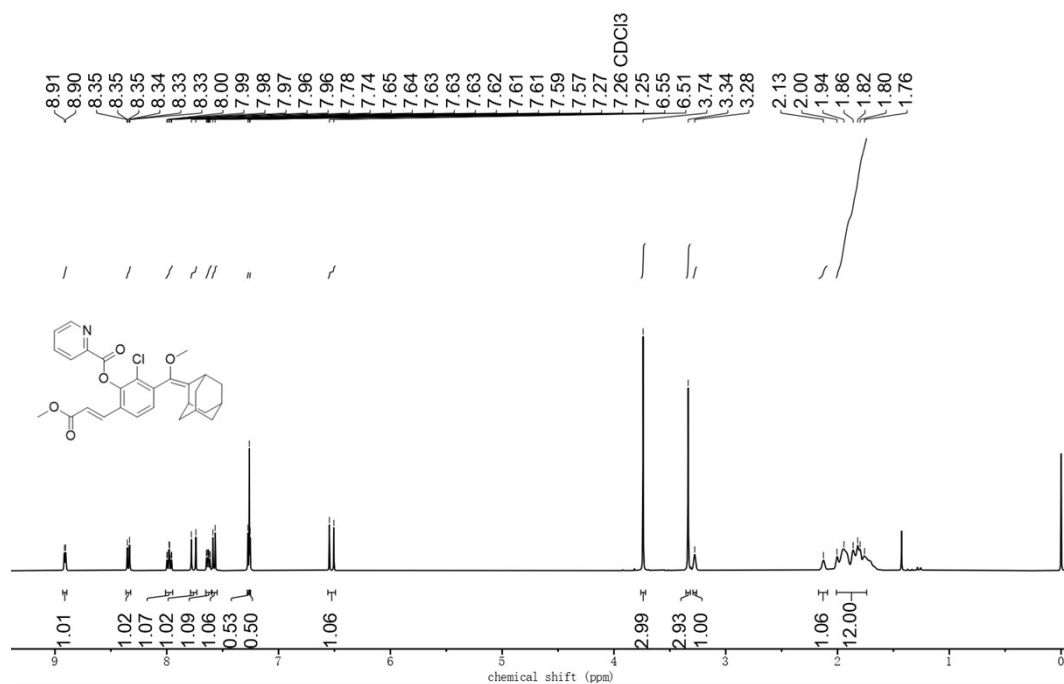

Figure S15  $^1\text{H}$  NMR spectrum of Ac-Py in  $\text{CDCl}_3$ .

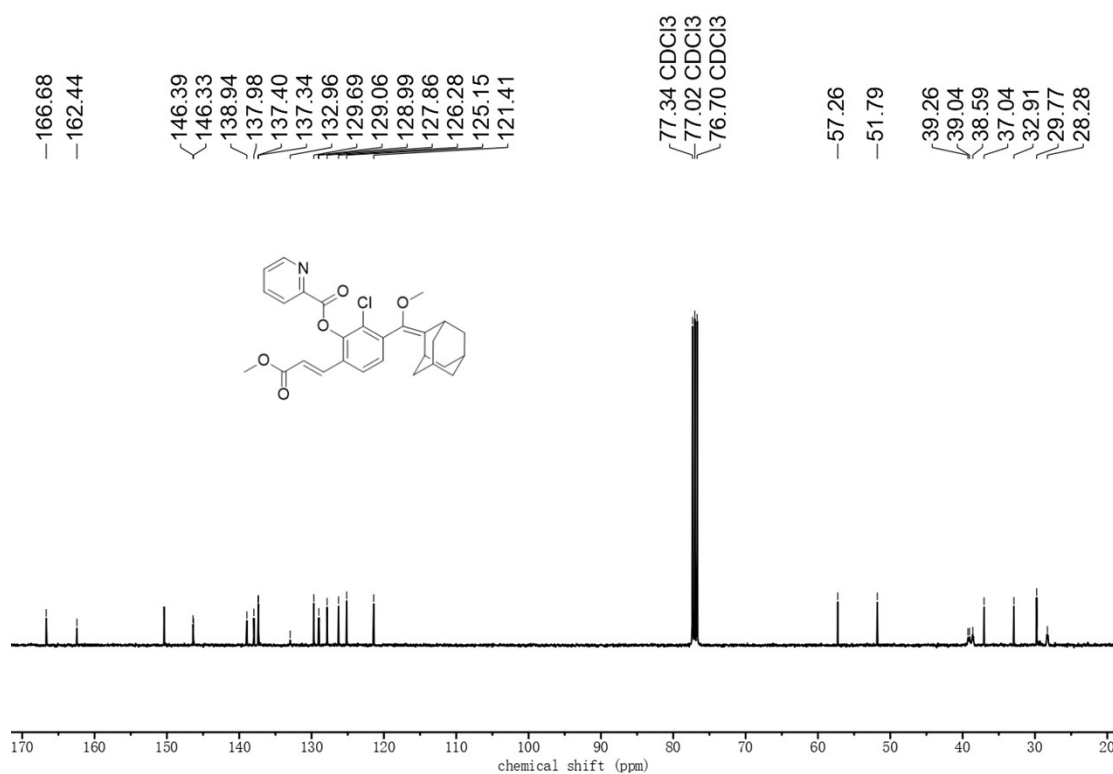

Figure S16  $^{13}\text{C}$  NMR spectrum of Ac-Py in  $\text{CDCl}_3$ .

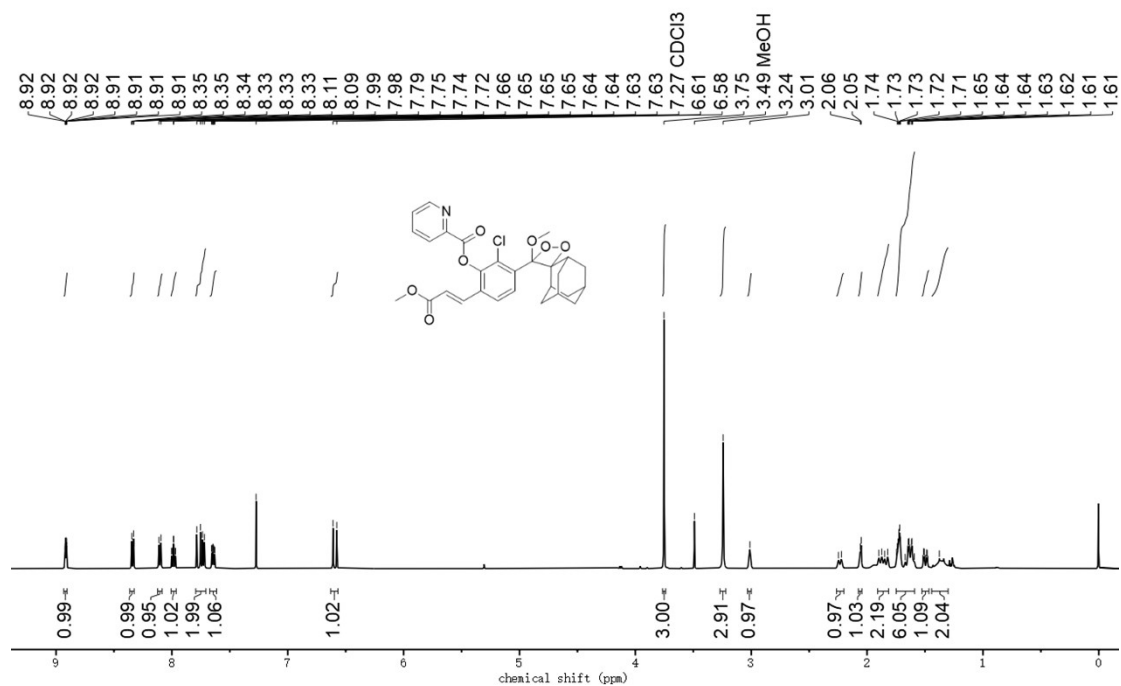

Figure S17  $^1\text{H}$  NMR spectrum of Ac-Do-Py in  $\text{CDCl}_3$ .

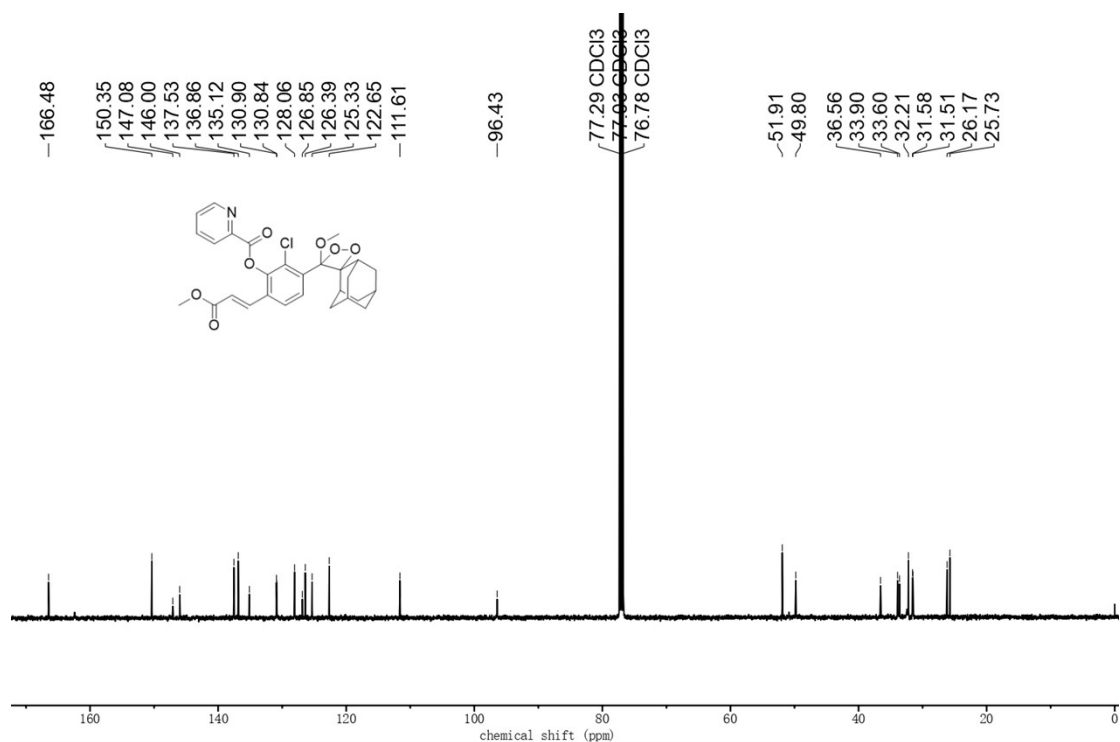

Figure S18  $^{13}\text{C}$  NMR spectrum of Ac-Do-Py in  $\text{CDCl}_3$ .

## References

- (1) M. J. Frisch, G. W. Trucks, H. B. Schlegel, G. E. Scuseria, M. A. Robb, J. R. Cheeseman, G. Scalmani, V. Barone, G. A. Petersson, H. Nakatsuji, X. Li, M. Caricato, A. V. Marenich, J. Bloino, B. G. Janesko, R. Gomperts, B. Mennucci, H. P. Hratchian, J. V. Ortiz, A. F. Izmaylov, J. L. Sonnenberg, D. Williams-Young, F. Ding, F. Lipparini, F. Egidi, J. Goings, B. Peng, A. Petrone, T. Henderson, D. Ranasinghe, V. G. Zakrzewski, J. Gao, N. Rega, G. Zheng, W. Liang, M. Hada, M. Ehara, K. Toyota, R. Fukuda, J. Hasegawa, M. Ishida, T. Nakajima, Y. Honda, O. Kitao, H. Nakai, T. Vreven, K. Throssell, Jr. J. A. Montgomery, J. E. Peralta, F. Ogliaro, M. J. Bearpark, J. J. Heyd, E. N. Brothers, K. N. Kudin, V. N. Staroverov, T. A. Keith, R. Kobayashi, J. Normand, K. Raghavachari, A. P. Rendell, J. C. Burant, S. S. Iyengar, J. Tomasi, M. Cossi, J. M. Millam, M. Klene, C. Adamo, R. Cammi, J. W. Ochterski, R. L. Martin, K. Morokuma, O. Farkas, J. B. Foresman, D. J. Fox, *Gaussian 16, Revision C.01*. Gaussian, Inc., Wallingford, CT, 2019.
- (2) T. Lu, F. Chen, *J. Comput. Chem.* 2012, **33**, 580.
- (3) 11 ) T. Lu, *J. Chem. Phys.* 2024, **161**, 082503.
- (4) W. Humphrey, A. Dalke, K. Schulten, *J. Mol. Graphics* 1996, **14**, 33.
- (5) N. Hananya, J. Reid, O. Green, M. Sigman, D. Shabat, *Chem. Sci.* 2019, **10**, 1380-1385.
- (6) H. Li, Y. Hu, Z. Lin, X. Yan, C. Sun, D. Yao, *Food Chem.*, 2024, **460**, 140405
- (7) Y. Sun, X. Zhai, Y. Xu, C. Liu, X. Zou, Z. Li, J. Shi, X. Huang, *Food Control* 2021, **122**, 107772.
- (8) Y. Shen, Q. Ou, Y. Q. Yang, W. W. Zhu, S. S. Zhao, X. C. Tan, K. J. Huang, J. Yan, *Talanta* 2025, **284**, 127233.
- (9) Z. Lu, M. Chen, M. Li, T. Liu, M. Sun, C. Wu, G. Su, J. Yin, M. Wu, P. Zou, L. Lin, X. Wang, Q. Huang, H. Yin, H. Rao, X. Zhou, J. Ye, Y. Wang, *Chem. Eng. J.*, 2022, **439**, 135686.
- (10) L. Chen, J. Lu, M. Luo, H. Yu, X. Chen, J. Deng, X. Hou, E. Hao, J. Wei, P. Li, *Food Chem.*, 2022, **379**, 132139
- (11) X. Yan, R. Zou, Q. Lin, Y. Ma, A. Li, X. Sun, G. Lu, H. Li, *Food Chem.*, 2024, **452**, 139569.
